# Supplementary material
Source: MDPI journal article supplement (https://www.mdpi.com/2073-4441/16/5/771)
Supplement: s1 [file s1]

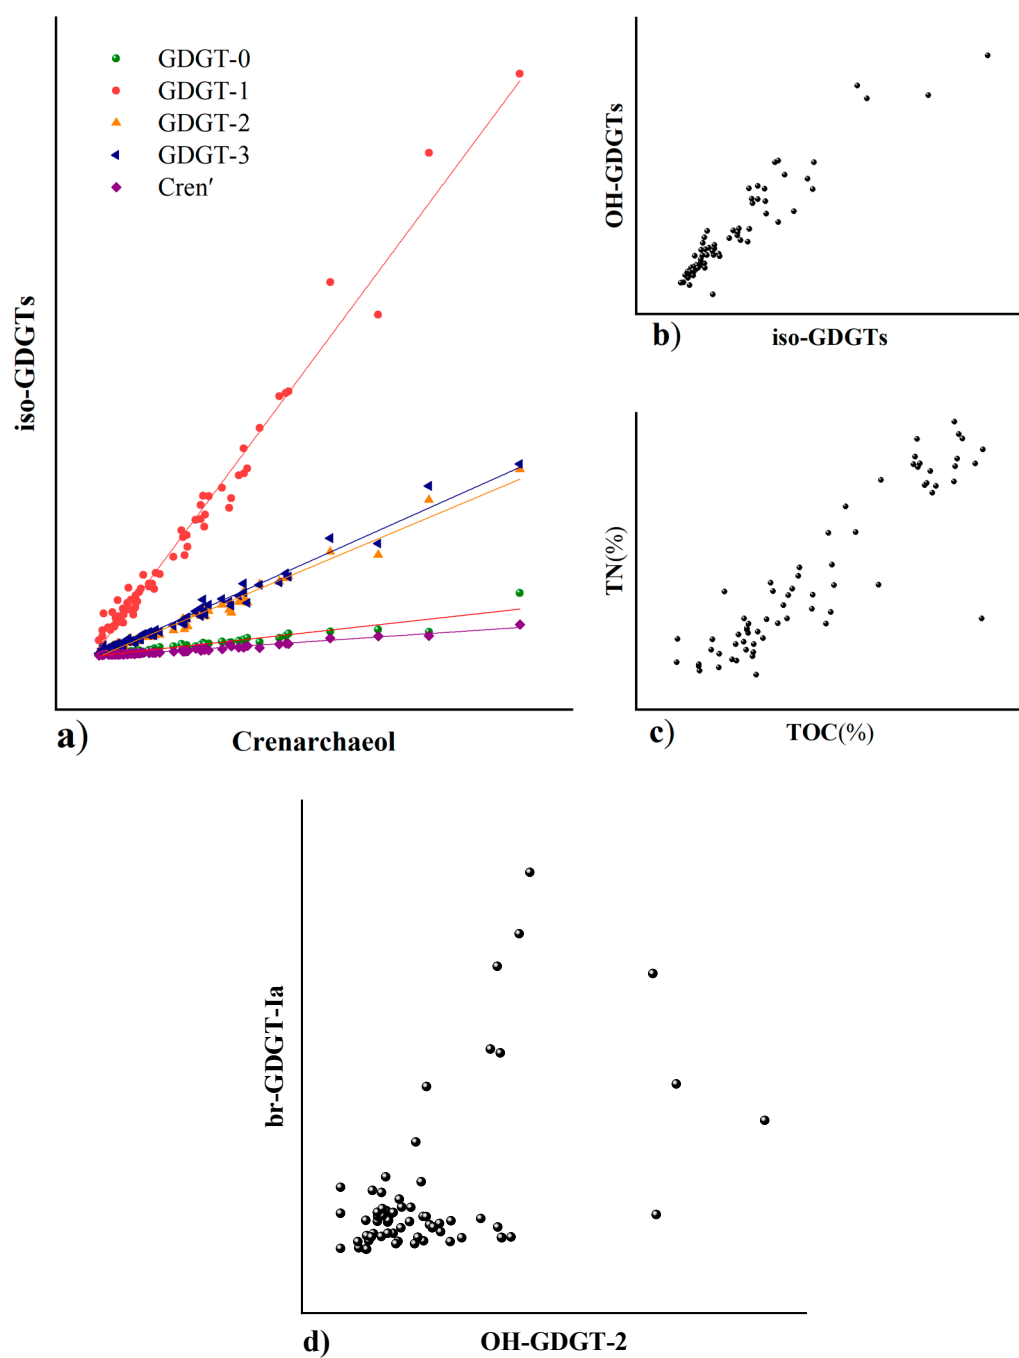

**Figure S1.** Relationship between GDGTs. (a) *Crenarchaeol* and other *iso*-GDGTs; (b) *iso*-GDGTs and OH-GDGTs; (c) relationship between TOC and TN; (d) OH-GDGT-2 and br-GDGT-Ia.

**Table S1.** Total organic carbon (TOC) and total nitrogen (TN) content,  $\delta^{13}\text{C}$  and  $\delta^{15}\text{N}$  values, and C/N ratio in core GC10.

| Depth(cm) | $\delta^{15}\text{N}_{\text{Air}}$<br>‰ | TN % | $\delta^{13}\text{C}_{\text{V-PDB}}$<br>‰ | TOC % | C/N   |
|-----------|-----------------------------------------|------|-------------------------------------------|-------|-------|
| 4         | 4.71                                    | 0.17 | -20.87                                    | 1.75  | 11.78 |
| 6         | 4.53                                    | 0.18 | -20.12                                    | 1.73  | 11.21 |
| 10        | 4.63                                    | 0.17 | -20.08                                    | 1.75  | 11.77 |
| 12        | 4.68                                    | 0.17 | -20.29                                    | 1.76  | 12.01 |
| 16        | 4.58                                    | 0.18 | -20.18                                    | 1.81  | 11.80 |
| 18        | 4.55                                    | 0.18 | -20.89                                    | 1.87  | 12.00 |
| 22        | 4.62                                    | 0.18 | -20.11                                    | 1.74  | 11.37 |
| 24        | 4.36                                    | 0.19 | -20.17                                    | 1.81  | 11.22 |
| 28        | 4.38                                    | 0.19 | -20.26                                    | 1.82  | 11.45 |
| 30        | 4.47                                    | 0.18 | -20.46                                    | 1.73  | 10.98 |
| 34        | 4.36                                    | 0.18 | -20.67                                    | 1.82  | 11.57 |
| 36        | 4.62                                    | 0.18 | -20.49                                    | 1.73  | 11.40 |
| 40        | 4.58                                    | 0.17 | -20.58                                    | 1.81  | 12.12 |
| 42        | 4.59                                    | 0.18 | -21.13                                    | 1.85  | 12.12 |
| 46        | 4.50                                    | 0.18 | -20.58                                    | 1.72  | 11.30 |
| 48        | 4.48                                    | 0.17 | -20.59                                    | 1.77  | 11.95 |
| 52        | 4.55                                    | 0.18 | -20.46                                    | 1.76  | 11.63 |
| 54        | 4.56                                    | 0.18 | -20.73                                    | 1.81  | 11.89 |
| 58        | 4.67                                    | 0.17 | -20.81                                    | 1.66  | 11.09 |
| 60        | 4.81                                    | 0.17 | -20.51                                    | 1.58  | 10.99 |
| 64        | 4.68                                    | 0.16 | -20.61                                    | 1.55  | 11.16 |
| 66        | 4.58                                    | 0.15 | -20.93                                    | 1.49  | 11.30 |
| 70        | 4.37                                    | 0.15 | -20.81                                    | 1.55  | 11.76 |
| 72        | 4.67                                    | 0.15 | -20.76                                    | 1.48  | 11.43 |
| 76        | 4.67                                    | 0.15 | -20.78                                    | 1.46  | 11.62 |
| 78        | 4.64                                    | 0.15 | -21.27                                    | 1.56  | 12.18 |
| 82        | 4.64                                    | 0.15 | -20.86                                    | 1.33  | 10.52 |
| 84        | 4.75                                    | 0.15 | -20.90                                    | 1.43  | 11.11 |
| 88        | 4.67                                    | 0.14 | -20.87                                    | 1.45  | 11.73 |
| 90        | 4.78                                    | 0.15 | -21.19                                    | 1.47  | 11.57 |
| 94        | 4.72                                    | 0.15 | -21.25                                    | 1.51  | 12.02 |
| 96        | 4.86                                    | 0.15 | -21.22                                    | 1.43  | 11.29 |
| 100       | 4.83                                    | 0.15 | -21.69                                    | 1.65  | 12.89 |
| 102       | 4.73                                    | 0.14 | -22.28                                    | 1.86  | 15.36 |
| 106       | 4.81                                    | 0.14 | -21.05                                    | 1.38  | 11.67 |
| 108       | 4.90                                    | 0.14 | -21.04                                    | 1.38  | 11.59 |
| 112       | 4.88                                    | 0.14 | -21.61                                    | 1.41  | 12.03 |
| 114       | 4.64                                    | 0.16 | -20.59                                    | 1.60  | 11.56 |
| 118       | 4.85                                    | 0.14 | -21.63                                    | 1.54  | 12.83 |
| 120       | 5.00                                    | 0.14 | -21.26                                    | 1.44  | 11.99 |

|     |      |      |        |      |       |
|-----|------|------|--------|------|-------|
| 124 | 4.74 | 0.14 | -21.32 | 1.39 | 12.00 |
| 126 | 4.72 | 0.14 | -21.34 | 1.24 | 10.54 |
| 130 | 4.37 | 0.14 | -21.16 | 1.40 | 11.81 |
| 132 | 4.56 | 0.14 | -21.18 | 1.37 | 11.32 |
| 136 | 4.34 | 0.14 | -21.44 | 1.55 | 12.66 |
| 138 | 4.46 | 0.14 | -21.00 | 1.42 | 11.72 |
| 142 | 4.49 | 0.14 | -21.40 | 1.46 | 12.05 |
| 144 | 4.38 | 0.14 | -20.90 | 1.36 | 11.53 |
| 148 | 4.48 | 0.14 | -21.68 | 1.51 | 12.28 |
| 150 | 4.45 | 0.14 | -21.07 | 1.38 | 11.49 |
| 154 | 4.59 | 0.14 | -21.09 | 1.38 | 11.55 |
| 156 | 4.58 | 0.14 | -20.81 | 1.31 | 11.17 |
| 160 | 4.49 | 0.14 | -21.30 | 1.37 | 11.77 |
| 162 | 4.58 | 0.13 | -21.14 | 1.30 | 11.35 |
| 166 | 4.29 | 0.13 | -21.36 | 1.32 | 11.86 |
| 168 | 4.61 | 0.14 | -21.35 | 1.36 | 11.67 |
| 172 | 4.49 | 0.13 | -21.25 | 1.36 | 12.04 |
| 174 | 4.38 | 0.13 | -21.13 | 1.28 | 11.46 |
| 178 | 4.45 | 0.13 | -21.43 | 1.35 | 11.93 |
| 180 | 4.19 | 0.13 | -21.19 | 1.28 | 11.42 |
| 184 | 4.43 | 0.13 | -21.69 | 1.39 | 12.16 |
| 186 | 4.21 | 0.13 | -21.04 | 1.23 | 10.97 |
| 190 | 4.12 | 0.13 | -21.56 | 1.40 | 12.72 |
| 192 | 4.23 | 0.13 | -21.38 | 1.38 | 11.98 |
| 196 | 4.22 | 0.13 | -21.49 | 1.32 | 11.58 |
| 198 | 4.13 | 0.13 | -21.67 | 1.39 | 12.24 |
| 200 | 4.49 | 0.13 | -21.36 | 1.28 | 11.57 |

**Table S2.** Reconstruct paleotemperatures based on TEX<sub>86</sub> and RI-OH in core GC10.

| Depth/cm | TEX <sub>86</sub> -SST | RI-SST | RI-OH <sub>summer-SST</sub> | OH-2/OHs-SST |
|----------|------------------------|--------|-----------------------------|--------------|
| 4        | 23.624                 | 21.829 | 26.78                       | 30.36        |
| 6        | 24.047                 | 23.877 | 27.79                       | 30.53        |
| 10       | 23.776                 | 22.249 | 26.99                       | 30.57        |
| 12       | 23.214                 | 21.498 | 26.62                       | 30.44        |
| 16       | 23.432                 |        | -0.09                       | 30.55        |
| 18       | 25.220                 | 24.287 | 27.99                       | 30.63        |
| 22       | 24.173                 | 24.994 | 28.34                       | 30.52        |
| 24       | 23.706                 | 24.330 | 28.01                       | 30.37        |
| 28       | 23.308                 | 24.283 | 27.99                       | 30.44        |
| 30       | 24.350                 | 23.828 | 27.76                       | 30.44        |
| 34       | 21.778                 | 22.959 | 27.34                       | 30.38        |
| 36       | 23.702                 | 22.723 | 27.22                       | 30.42        |
| 40       | 23.712                 | 22.496 | 27.11                       | 30.50        |
| 42       | 22.974                 | 22.093 | 26.91                       | 30.43        |

|     |        |        |       |       |
|-----|--------|--------|-------|-------|
| 46  | 22.394 | 23.783 | 27.74 | 30.34 |
| 48  | 23.659 | 21.456 | 26.60 | 30.45 |
| 52  | 24.205 | 23.075 | 27.39 | 30.49 |
| 54  | 22.560 | 22.250 | 26.99 | 30.45 |
| 58  | 23.889 | 22.862 | 27.29 | 30.49 |
| 60  | 23.382 | 23.150 | 27.43 | 30.47 |
| 64  | 23.263 | 21.706 | 26.72 | 30.52 |
| 66  | 25.060 | 23.346 | 27.53 | 30.63 |
| 70  | 23.907 | 21.209 | 26.48 | 30.50 |
| 72  | 25.103 | 23.466 | 27.58 | 30.66 |
| 76  | 23.910 | 23.406 | 27.55 | 30.54 |
| 78  | 23.772 | 23.277 | 27.49 | 30.43 |
| 82  | 25.138 | 2.850  | 17.46 | 30.64 |
| 84  | 25.096 | 23.822 | 27.76 | 30.63 |
| 88  | 24.371 | 22.308 | 27.02 | 30.65 |
| 90  | 24.311 | 22.038 | 26.88 | 30.63 |
| 94  | 23.999 | 22.876 | 27.29 | 30.51 |
| 96  | 24.625 | 22.202 | 26.96 | 30.59 |
| 100 | 23.850 | 21.526 | 26.63 | 30.54 |
| 102 | 25.422 | 20.732 | 26.24 | 30.66 |
| 106 | 24.034 | 22.659 | 27.19 | 30.59 |
| 108 | 24.937 | 22.952 | 27.33 | 30.69 |
| 112 | 23.273 | 22.892 | 27.30 | 30.54 |
| 114 | 21.284 | 24.406 | 28.05 | 30.42 |
| 118 | 23.709 | 22.179 | 26.95 | 30.54 |
| 120 | 24.825 | 22.692 | 27.20 | 30.68 |
| 124 | 25.235 | 22.645 | 27.18 | 30.68 |
| 126 | 24.620 | 23.070 | 27.39 | 30.62 |
| 130 | 23.978 | 22.180 | 26.95 | 30.61 |
| 132 | 23.692 | 21.019 | 26.38 | 30.64 |
| 136 | 24.874 | 24.102 | 27.90 | 30.64 |
| 138 | 23.990 | 22.643 | 27.18 | 30.58 |
| 142 | 24.110 | 22.792 | 27.25 | 30.67 |
| 144 | 21.297 | 24.816 | 28.25 | 30.51 |
| 148 | 20.711 | 22.287 | 27.01 | 30.62 |
| 150 | 24.797 | 23.222 | 27.46 | 30.67 |
| 154 | 24.939 | 22.476 | 27.10 | 30.61 |
| 156 | 24.773 | 24.437 | 28.06 | 30.68 |
| 160 | 23.252 | 23.810 | 27.75 | 30.58 |
| 162 | 25.438 | 23.861 | 17.46 | 30.71 |
| 166 | 23.332 | 23.189 | 27.45 | 30.50 |
| 168 | 22.224 | 21.755 | 26.74 | 30.52 |
| 172 | 25.476 | 22.604 | 27.16 | 30.71 |
| 174 | 25.049 | 24.815 | 28.25 | 30.62 |

|     |        |        |       |       |
|-----|--------|--------|-------|-------|
| 178 | 23.100 | 22.864 | 27.29 | 30.61 |
| 180 | 25.126 | 21.314 | 26.53 | 30.68 |
| 184 | 26.696 | 21.876 | 26.80 | 30.76 |
| 186 | 24.566 |        | -0.09 | 30.63 |
| 190 | 24.096 | 23.692 | 27.70 | 30.61 |
| 192 | 23.745 | 21.990 | 26.86 | 30.53 |
| 196 | 24.957 | 23.816 | 27.76 | 30.54 |
| 198 | 22.173 | 21.866 | 26.80 | 30.41 |
| 200 | 23.104 | 22.083 | 26.91 | 30.50 |

**Table S3.** Indices of br-GDGTs and percentage of terrestrial organic carbon based on a binary mixing model of  $\delta^{13}\text{C}$  and BIT.

| Depth(cm) | BIT  | DC   | $\delta^{13}\text{C}$ -OC% <sub>terr</sub> | BIT -OC% <sub>terr</sub> |
|-----------|------|------|--------------------------------------------|--------------------------|
| 4         | 0.09 | 0.24 | 12.36%                                     | 7.10%                    |
| 6         | 0.06 | 0.27 | 1.70%                                      | 3.76%                    |
| 10        | 0.05 | 0.26 | 1.11%                                      | 2.42%                    |
| 12        | 0.04 | 0.25 | 4.17%                                      | 0.97%                    |
| 16        | 0.04 | 0.27 | 2.53%                                      | 1.37%                    |
| 18        | 0.04 | 0.29 | 12.70%                                     | 1.23%                    |
| 22        | 0.05 | 0.29 | 1.63%                                      | 1.88%                    |
| 24        | 0.05 | 0.30 | 2.43%                                      | 1.78%                    |
| 28        | 0.02 | 0.29 | 3.76%                                      | -0.98%                   |
| 30        | 0.03 | 0.30 | 6.59%                                      | -0.02%                   |
| 34        | 0.02 | 0.29 | 9.50%                                      | -0.72%                   |
| 36        | 0.04 | 0.28 | 6.99%                                      | 1.27%                    |
| 40        | 0.04 | 0.29 | 8.33%                                      | 1.53%                    |
| 42        | 0.02 | 0.29 | 16.20%                                     | -0.86%                   |
| 46        | 0.02 | 0.32 | 8.29%                                      | -0.94%                   |
| 48        | 0.02 | 0.28 | 8.47%                                      | -0.82%                   |
| 52        | 0.03 | 0.32 | 6.50%                                      | 0.37%                    |
| 54        | 0.02 | 0.29 | 10.37%                                     | -0.92%                   |
| 58        | 0.04 | 0.29 | 11.50%                                     | 0.59%                    |
| 60        | 0.05 | 0.27 | 7.23%                                      | 2.53%                    |
| 64        | 0.04 | 0.29 | 8.74%                                      | 1.65%                    |
| 66        | 0.05 | 0.26 | 13.27%                                     | 2.74%                    |
| 70        | 0.04 | 0.24 | 11.56%                                     | 1.23%                    |
| 72        | 0.06 | 0.25 | 10.80%                                     | 3.10%                    |
| 76        | 0.07 | 0.21 | 11.13%                                     | 4.18%                    |
| 78        | 0.08 | 0.24 | 18.20%                                     | 5.49%                    |
| 82        | 0.07 | 0.24 | 12.34%                                     | 4.97%                    |
| 84        | 0.07 | 0.23 | 12.86%                                     | 4.53%                    |
| 88        | 0.08 | 0.21 | 12.39%                                     | 5.78%                    |
| 90        | 0.06 | 0.22 | 16.99%                                     | 3.85%                    |

|     |      |      |        |        |
|-----|------|------|--------|--------|
| 94  | 0.09 | 0.22 | 17.90% | 7.03%  |
| 96  | 0.08 | 0.24 | 17.47% | 5.76%  |
| 100 | 0.06 | 0.21 | 24.17% | 2.86%  |
| 102 | 0.09 | 0.22 | 32.61% | 6.38%  |
| 106 | 0.10 | 0.20 | 14.96% | 7.38%  |
| 108 | 0.08 | 0.20 | 14.84% | 6.09%  |
| 112 | 0.07 | 0.19 | 22.94% | 4.10%  |
| 114 | 0.05 | 0.24 | 8.41%  | 2.67%  |
| 118 | 0.12 | 0.19 | 23.30% | 9.68%  |
| 120 | 0.11 | 0.18 | 17.94% | 9.10%  |
| 124 | 0.10 | 0.20 | 18.90% | 8.23%  |
| 126 | 0.11 | 0.21 | 19.10% | 9.34%  |
| 130 | 0.10 | 0.22 | 16.51% | 8.09%  |
| 132 | 0.10 | 0.19 | 16.80% | 7.58%  |
| 136 | 0.09 | 0.21 | 20.54% | 6.78%  |
| 138 | 0.09 | 0.21 | 14.27% | 6.78%  |
| 142 | 0.11 | 0.19 | 20.06% | 9.53%  |
| 144 | 0.10 | 0.20 | 12.86% | 8.33%  |
| 148 | 0.13 | 0.17 | 23.93% | 11.20% |
| 150 | 0.11 | 0.18 | 15.33% | 8.82%  |
| 154 | 0.12 | 0.20 | 15.57% | 10.46% |
| 156 | 0.13 | 0.19 | 11.57% | 10.67% |
| 160 | 0.09 | 0.17 | 18.50% | 6.49%  |
| 162 | 0.14 | 0.19 | 16.26% | 12.15% |
| 166 | 0.21 | 0.17 | 19.41% | 19.86% |
| 168 | 0.13 | 0.17 | 19.29% | 10.70% |
| 172 | 0.14 | 0.16 | 17.87% | 12.26% |
| 174 | 0.12 | 0.16 | 16.17% | 9.82%  |
| 178 | 0.12 | 0.17 | 20.40% | 9.92%  |
| 180 | 0.18 | 0.18 | 17.06% | 16.66% |
| 184 | 0.16 | 0.16 | 24.10% | 14.98% |
| 186 | 0.16 | 0.16 | 14.89% | 14.75% |
| 190 | 0.19 | 0.18 | 22.33% | 17.70% |
| 192 | 0.18 | 0.16 | 19.69% | 16.73% |
| 196 | 0.19 | 0.17 | 21.26% | 18.19% |
| 198 | 0.18 | 0.19 | 23.89% | 17.08% |
| 200 | 0.19 | 0.18 | 19.46% | 18.04% |

---

**Table S4.** Various indices were used to evaluate the source of GDGTs.

| <b>Depth<br/>/cm</b> | <b>%GDGT-0</b> | <b>GDGT-<br/>0/Cren</b> | <b>GDGT-<br/>2/Cren</b> | <b>%GDGT<br/>-2</b> | <b>MI</b> | <b>Cren/Cren'</b> | <b>#Rings<br/>indices</b> |
|----------------------|----------------|-------------------------|-------------------------|---------------------|-----------|-------------------|---------------------------|
| 4                    | 0.51           | 1.05                    | 0.27                    | 0.39                | 0.35      | 10.22             | 0.84                      |
| 6                    | 0.39           | 0.65                    | 0.18                    | 0.40                | 0.27      | 15.70             | 0.38                      |
| 10                   | 0.33           | 0.48                    | 0.15                    | 0.39                | 0.24      | 17.88             | 0.29                      |
| 12                   | 0.38           | 0.62                    | 0.20                    | 0.43                | 0.29      | 22.64             | 0.33                      |
| 16                   | 0.35           | 0.54                    | 0.17                    | 0.41                | 0.25      | 20.82             | 0.51                      |
| 18                   | 0.35           | 0.53                    | 0.19                    | 0.47                | 0.26      | 24.18             | 1.00                      |
| 22                   | 0.35           | 0.55                    | 0.19                    | 0.44                | 0.27      | 19.77             | 0.78                      |
| 24                   | 0.41           | 0.68                    | 0.22                    | 0.41                | 0.31      | 13.49             | 0.35                      |
| 28                   | 0.40           | 0.66                    | 0.21                    | 0.43                | 0.29      | 19.32             | 0.30                      |
| 30                   | 0.41           | 0.68                    | 0.24                    | 0.45                | 0.31      | 17.29             | 0.40                      |
| 34                   | 0.40           | 0.66                    | 0.21                    | 0.43                | 0.30      | 24.30             | 0.31                      |
| 36                   | 0.40           | 0.66                    | 0.23                    | 0.45                | 0.31      | 18.91             | 0.34                      |
| 40                   | 0.40           | 0.65                    | 0.21                    | 0.45                | 0.28      | 21.09             | 0.36                      |
| 42                   | 0.40           | 0.66                    | 0.20                    | 0.41                | 0.29      | 17.73             | 1.17                      |
| 46                   | 0.43           | 0.74                    | 0.25                    | 0.46                | 0.33      | 27.86             | 0.34                      |
| 48                   | 0.38           | 0.62                    | 0.21                    | 0.44                | 0.29      | 18.71             | 0.34                      |
| 52                   | 0.37           | 0.58                    | 0.20                    | 0.44                | 0.28      | 18.83             | 0.35                      |
| 54                   | 0.40           | 0.68                    | 0.19                    | 0.41                | 0.28      | 20.80             | 0.33                      |
| 58                   | 0.37           | 0.59                    | 0.20                    | 0.43                | 0.28      | 19.76             | 0.33                      |
| 60                   | 0.37           | 0.60                    | 0.19                    | 0.42                | 0.28      | 18.55             | 0.31                      |
| 64                   | 0.37           | 0.59                    | 0.19                    | 0.44                | 0.27      | 25.85             | 0.35                      |
| 66                   | 0.36           | 0.56                    | 0.17                    | 0.43                | 0.25      | 18.10             | 0.30                      |
| 70                   | 0.39           | 0.65                    | 0.21                    | 0.45                | 0.28      | 19.48             | 0.26                      |
| 72                   | 0.34           | 0.51                    | 0.17                    | 0.45                | 0.24      | 22.32             | 0.37                      |
| 76                   | 0.34           | 0.52                    | 0.17                    | 0.41                | 0.26      | 20.36             | 0.27                      |
| 78                   | 0.44           | 0.77                    | 0.24                    | 0.44                | 0.32      | 19.43             | 0.24                      |
| 82                   | 0.35           | 0.55                    | 0.16                    | 0.42                | 0.24      | 16.50             | 0.26                      |
| 84                   | 0.36           | 0.56                    | 0.19                    | 0.46                | 0.26      | 23.76             | 0.25                      |
| 88                   | 0.35           | 0.53                    | 0.16                    | 0.43                | 0.24      | 25.09             | 0.29                      |
| 90                   | 0.38           | 0.60                    | 0.16                    | 0.42                | 0.24      | 18.59             | 0.23                      |
| 94                   | 0.37           | 0.59                    | 0.19                    | 0.43                | 0.28      | 21.60             | 0.24                      |
| 96                   | 0.35           | 0.54                    | 0.17                    | 0.41                | 0.25      | 18.86             | 0.26                      |
| 100                  | 0.38           | 0.60                    | 0.18                    | 0.42                | 0.28      | 26.40             | 0.90                      |
| 102                  | 0.35           | 0.53                    | 0.17                    | 0.43                | 0.24      | 18.90             | 1.83                      |
| 106                  | 0.37           | 0.59                    | 0.17                    | 0.42                | 0.25      | 21.75             | 0.30                      |
| 108                  | 0.37           | 0.58                    | 0.16                    | 0.43                | 0.24      | 21.81             | 0.36                      |
| 112                  | 0.38           | 0.61                    | 0.19                    | 0.44                | 0.27      | 26.22             | 1.12                      |
| 114                  | 0.38           | 0.61                    | 0.17                    | 0.38                | 0.27      | 19.52             | 0.61                      |
| 118                  | 0.37           | 0.58                    | 0.17                    | 0.39                | 0.26      | 17.49             | 0.50                      |
| 120                  | 0.36           | 0.57                    | 0.17                    | 0.45                | 0.24      | 24.21             | 1.03                      |
| 124                  | 0.33           | 0.49                    | 0.17                    | 0.46                | 0.24      | 27.94             | 0.62                      |

|     |      |      |      |      |      |       |      |
|-----|------|------|------|------|------|-------|------|
| 126 | 0.35 | 0.53 | 0.17 | 0.43 | 0.25 | 21.71 | 1.09 |
| 130 | 0.32 | 0.48 | 0.14 | 0.39 | 0.23 | 18.50 | 0.64 |
| 132 | 0.32 | 0.47 | 0.14 | 0.41 | 0.22 | 25.70 | 0.61 |
| 136 | 0.30 | 0.42 | 0.16 | 0.44 | 0.24 | 26.39 | 0.73 |
| 138 | 0.43 | 0.76 | 0.19 | 0.43 | 0.28 | 24.70 | 0.60 |
| 142 | 0.34 | 0.52 | 0.15 | 0.44 | 0.23 | 29.62 | 0.22 |
| 144 | 0.37 | 0.60 | 0.15 | 0.39 | 0.25 | 26.95 | 0.49 |
| 148 | 0.34 | 0.51 | 0.10 | 0.32 | 0.20 | 23.22 | 0.19 |
| 150 | 0.33 | 0.50 | 0.16 | 0.44 | 0.24 | 26.97 | 0.34 |
| 154 | 0.35 | 0.54 | 0.17 | 0.43 | 0.26 | 21.01 | 0.23 |
| 156 | 0.37 | 0.59 | 0.15 | 0.41 | 0.23 | 18.32 | 0.62 |
| 160 | 0.41 | 0.69 | 0.19 | 0.46 | 0.27 | 42.07 | 0.89 |
| 162 | 0.33 | 0.50 | 0.16 | 0.44 | 0.23 | 24.05 | 0.35 |
| 166 | 0.37 | 0.60 | 0.17 | 0.40 | 0.27 | 19.90 | 0.42 |
| 168 | 0.45 | 0.83 | 0.19 | 0.42 | 0.29 | 24.59 | 0.55 |
| 172 | 0.32 | 0.48 | 0.15 | 0.44 | 0.23 | 25.49 | 0.81 |
| 174 | 0.38 | 0.61 | 0.18 | 0.43 | 0.26 | 21.87 | 0.17 |
| 178 | 0.37 | 0.59 | 0.15 | 0.40 | 0.24 | 25.67 | 0.53 |
| 180 | 0.33 | 0.50 | 0.16 | 0.45 | 0.24 | 25.54 | 0.22 |
| 184 | 0.30 | 0.42 | 0.14 | 0.40 | 0.20 | 14.57 | 0.18 |
| 186 | 0.33 | 0.49 | 0.15 | 0.42 | 0.24 | 21.15 | 0.20 |
| 190 | 0.35 | 0.54 | 0.16 | 0.41 | 0.24 | 21.05 | 0.21 |
| 192 | 0.37 | 0.59 | 0.18 | 0.41 | 0.27 | 20.03 | 0.60 |
| 196 | 0.34 | 0.52 | 0.19 | 0.43 | 0.27 | 21.27 | 0.35 |
| 198 | 0.41 | 0.69 | 0.20 | 0.42 | 0.30 | 27.77 | 0.45 |
| 200 | 0.43 | 0.77 | 0.20 | 0.42 | 0.29 | 20.98 | 0.63 |

**Table S5.** Annual average surface seawater temperature (SST) and surface seawater salinity (SSS) data of the equatorial Atlantic from 1955 to 2017(3.5°N; 5.5°E).

| Month        | 1     | 2     | 3     | 4     | 5     | 6     | 7     | 8     | 9     | 10    | 11    | 12    |
|--------------|-------|-------|-------|-------|-------|-------|-------|-------|-------|-------|-------|-------|
| Salinity/psu | /     | 33.91 | 32.60 | 34.66 | 34.00 | 33.49 | 34.62 | 34.38 | 33.69 | 32.81 | 30.48 | 29.69 |
| SST/°C       | 27.51 | 29.06 | 29.26 | 27.79 | 28.99 | 28.11 | 26.72 | 26.06 | 26.51 | 27.67 | 27.99 | 28.36 |
